# Supplementary material for: Pneumococcal Phasevarions Control Multiple Virulence Traits, Including Vaccine Candidate Expression
Source: PubMed Central journal article supplement (PMC9241608; doi:10.1128/spectrum.00916-22), 2022-05-10
Supplement: spectrum.00916-22-s001.pdf [file spectrum.00916-22-s001.pdf]

## Supplementary Tables

**A**

| Strain              | SpnIII System Genetic Region |       |       |       |      |      |       |      |      | Methyltransferase | Type | Serotype     | Sequence Type |
|---------------------|------------------------------|-------|-------|-------|------|------|-------|------|------|-------------------|------|--------------|---------------|
|                     | 1                            | 2     | 3     | 4     | 5    | 6    | 7     | 8    | 9    |                   |      |              |               |
| 310                 | 1.1>                         | 1.2>  | PsrA> | 2.3>  | <2.2 | <1.1 |       |      |      | <M                | 3    | 24F          | 11618         |
| 335                 | 1.1>                         | 2.3>  | <2.2  | <PsrA | <2.1 | <1.2 |       |      |      | <M                | 1    | 19F          | 81            |
| 475                 | 1.1>                         | 1.2>  | <2.2  | <PsrA | <2.1 | <1.2 |       |      |      | <M                | 3    | 24F          | 15253         |
| 521                 | 1.2>                         | 2.1>  | PsrA> | 2.3>  | <2.2 | <1.1 |       |      |      | <M                | 1    | 24F          | 15253         |
| 521_2               | 1.2>                         | 2.1>  | PsrA> | 2.2>  | <2.3 | <1.1 |       |      |      | <M                | 1    | 24F          | 15253         |
| 525                 | 1.1>                         | 2.1>  | PsrA> | 2.3>  | <2.2 | <1.1 |       |      |      | <M                | 1    | 24F          | 15253         |
| 563                 | 1.2>                         | 2.1>  | PsrA> | 2.2>  | <2.3 | <1.1 |       |      |      | <M                | 1    | 24F          | 15253         |
| 566                 | 1.1>                         | 2.1>  | PsrA> | 2.3>  | ?    | <1.2 |       |      |      | <M                | 1    | 24F          | 11618         |
| 573                 | 1.2>                         | 2.2>  | <2.3  | <PsrA | <2.1 | <1.1 |       |      |      | <M                | 1    | 24F          | 14184         |
| 574                 | 1.2>                         | 2.1<  | PsrA> | 2.3<  | <2.2 | <1.1 |       |      |      | <M                | 1    | 24F          | 11618         |
| 947                 | 1.1>                         | 2.1>  | PsrA> | ?     | ?    | <1.1 |       |      |      | <M                | 3    | 4            | 15            |
| 4496                | 1.2>                         | 2.1>  | PsrA> | 2.3>  | <2.2 | <1.1 |       |      |      | <M                | 1    | 1C           | 3018          |
| 70585               | 1.1>                         | 2.3>  | <2.2  | <1.2  |      |      |       |      |      | <M                | 2    | 5            | 289           |
| 11A                 | 1.2>                         | 2.1>  | PsrA> | 2.3>  | <2.2 | <1.1 |       |      |      | <M                | 1    | 11A          | 8279          |
| 180-15              | 1.2>                         | 2.3>  | <2.2  | <PsrA | <2.1 | <1.1 |       |      |      | <M                | 1    | 3            | 180           |
| 180-2               | 1.1>                         | 2.2>  | <2.3  | <PsrA | <2.1 | <1.2 |       |      |      | <M                | 1    | 3            | 180           |
| 19A-19339           | 1.2>                         | 2.3>  | <2.2  | <1.2  |      |      |       |      |      | <M                | 4    | 19A          | unidentified  |
| 2245STDY6178787     | 1.2>                         | 2.1>  | PsrA> | 2.3>  | 2.2> | <2.3 | <1.1  |      |      | <M                | 5    | 6B           | 315           |
| 4041STDY683227      | 1.2>                         | 2.1>  | PsrA> | 2.3>  | <2.2 | <1.1 |       |      |      | <M                | 1    | 12F          | unidentified  |
| 4041STDY6836166     | <2.2                         | <PsrA | <2.1  | <1.2  |      |      |       |      |      | <M                | 5    | 16F          | unidentified  |
| 4041STDY6836166_2   | 1.2>                         | 2.1>  | <PsrA | 2.2>  | 2.3> | <1.2 |       |      |      | <M                | 3    | 16F          | unidentified  |
| 4041STDY6836167     | 2.2>                         | <2.3  | M>    | 1.2>  | 2.2> | <2.3 | <PsrA | <2.1 | <1.2 | <M                | 5    | 9V           | unidentified  |
| 4041STDY6836169     | 1.2>                         | 2.1>  | PsrA> | 2.3>  | <2.2 | <1.1 |       |      |      | <M                | 1    | 6B           | unidentified  |
| 4041STDY6836169_2   | 1.1>                         | 2.1>  | PsrA> | 2.2>  | <2.3 | <1.1 |       |      |      | <M                | 3    | 6B           | unidentified  |
| 4041STDY6836170     | 1.2>                         | 2.2>  | <2.3  | <PsrA | <2.1 | <1.2 |       |      |      | <M                | 3    | 7C           | unidentified  |
| 670-6B              | 1.2>                         | 2.3>  | <2.2  | <PsrA | <2.1 | <1.1 |       |      |      | <M                | 1    | 6B           | 90            |
| 6A-10               | 1.2>                         | 2.1>  | PsrA> | 2.3>  | <2.2 | <1.1 |       |      |      | <M                | 1    | 6A           | 460           |
| A45                 |                              |       |       |       |      |      |       |      |      |                   |      | 3            | 6934          |
| A66                 |                              |       |       |       |      |      |       |      |      |                   |      | 3            | 378           |
| AP200               | 1.2>                         | 2.2>  | <2.3  | <PsrA | <2.1 | <1.1 |       |      |      | <M                | 1    | 11A          | 62            |
| ASP0581             | 1.1>                         | 2.3>  | <2.2  | <PsrA | <2.1 | <1.2 |       |      |      | <M                | 1    | 12F          | 4846          |
| ATCC 49619          | 1.2>                         | 2.1>  | PsrA> | 2.3>  | <2.2 | <1.1 |       |      |      | <M                | 1    | 19F          | 1203          |
| ATCC 700669         | 1.1>                         | 2.3>  | <2.2  | <PsrA | <2.1 | <1.2 |       |      |      | <M                | 1    | 23F          | 81            |
| AUSMDU00010538      | 1.2>                         | 2.1>  | PsrA> | ?     | ?    | <1.1 |       |      |      | <M                | 1    | 19A          | 199           |
| B1900               | 1.2>                         | 2.2>  | <2.3  | <1.1  |      |      |       |      |      | <M                | 2    | 3            | unidentified  |
| BHN97x              | 1.2>                         | 2.1>  | PsrA> | 2.3>  | <2.2 | <1.2 |       |      |      | <M                | 3    | 19F          | 425           |
| BVJ1JL              | 1.2>                         | 2.2>  | <2.3  | <PsrA | <2.1 | <1.2 |       |      |      | <M                | 3    | 1            | unidentified  |
| CGSP14              | 1.1>                         | 2.3>  | <2.2  | <1.2  |      |      |       |      |      | <M                | 2    | 14           | 15            |
| D39                 | 1.2>                         | 2.2<  | <2.3  | <PsrA | <2.1 | <1.1 |       |      |      | <M                | 1    | 2            | 595           |
| EF3030              | ?                            | 2.1>  | PsrA> | ?     | ?    | <1.1 |       |      |      | <M                | 1    | 19F          | 43            |
| FDAARGOS-1508       | 1.2>                         | 2.1>  | PsrA> | 2.2>  | <2.3 | <1.1 |       |      |      | <M                | 1    | unidentified | unidentified  |
| G54                 | 1.1>                         | 2.2>  | <2.3  | <1.1  |      |      |       |      |      | <M                | 4    | 19F          | NA*           |
| gamPNI0373          | 1.2>                         | 2.1>  | PsrA> | 2.3>  | <2.2 | <1.2 |       |      |      | <M                | 3    | 1            | 618           |
| GPSC10              | 1.2>                         | 2.1>  | ?     | ?     |      |      |       |      |      | <M                | 2    | 24F          | 2013          |
| GPSC10_2            | 1.2>                         | 2.2>  | <2.3  | <PsrA | <2.1 | <1.1 |       |      |      | <M                | 1    | 24F          | 2013          |
| GPSC18              | 2.2>                         | <2.3  | ?     | <PsrA | <2.1 | <1.1 |       |      |      | <M                | 1    | 14           | 13            |
| HKU1-14             | 1.2>                         | 2.2>  | <2.3  | <PsrA | <2.1 | <1.2 |       |      |      | <M                | 3    | unidentified | 6011          |
| Hungary 19A-6       | 1.2>                         | 2.1>  | PsrA> | 2.3>  | <2.2 | <1.1 |       |      |      | <M                | 1    | 19A          | 268           |
| HU-OH               | ?                            | <1.1  |       |       |      |      |       |      |      | <M                | 5    | 3            | 180           |
| INV104              | 1.2>                         | 2.3>  | <2.2  | <1.1  |      |      |       |      |      | <M                | 2    | 1            | 227           |
| INV200              | ?                            | 2.1>  | PsrA> | 2.3>  | <2.2 | <1.1 |       |      |      | <M                | 1    | 14           | 9             |
| JJA                 | 1.2>                         | 2.3>  | <2.2  | <PsrA | <2.1 | <1.1 |       |      |      | <M                | 1    | 19F          | 66            |
| KK0981              | 1.2>                         | 2.1>  | PsrA> | 2.3>  | <1.2 | <1.1 |       |      |      | <M                | 3    | 3            | 242           |
| M16808              | 1.1>                         | 2.1>  | PsrA> | 2.2>  | <2.3 | <1.2 |       |      |      | <M                | 1    | unidentified | unidentified  |
| M23734              | 1.2>                         | 2.1>  | PsrA> | 2.3>  | <2.2 | <1.2 |       |      |      | <M                | 3    | unidentified | unidentified  |
| M26365              | 1.2>                         | 2.2>  | <2.3  | <PsrA | <2.1 | <1.1 |       |      |      | <M                | 1    | unidentified | unidentified  |
| M26368              | 1.1>                         | 2.1>  | PsrA> | 2.3>  | <2.2 | <1.2 |       |      |      | <M                | 1    | unidentified | unidentified  |
| MDRSPN001           | 1.1>                         | 2.2>  | <2.3  | <PsrA | <2.1 | <1.2 |       |      |      | <M                | 1    | 19F          | 10017         |
| NCTC11902           | 1.2>                         | 2.1>  | PsrA> | 2.3>  | <2.2 | <1.1 |       |      |      | <M                | 1    | 14           | 124           |
| NCTC12977           | 1.1>                         | 2.1>  | PsrA> | 2.2>  | <2.3 | <1.2 |       |      |      | <M                | 1    | 19F          | 1203          |
| NCTC12977_2         | 1.1>                         | 2.1>  | PsrA> | 2.2>  | <2.3 | <1.2 |       |      |      | <M                | 1    | 19F          | 1203          |
| NCTC13276           | 1.2>                         | 2.2>  | <2.3  | <PsrA | <2.1 | <1.1 |       |      |      | <M                | 1    | NE           | 595           |
| NCTC7465            | 1.2>                         | >2.3  | <2.2  | <PsrA | <2.1 | <1.1 |       |      |      | <M                | 1    | 1            | 615           |
| NCTC7465_2          | 1.2>                         | 2.1>  | <PsrA | 2.3>  | <2.2 | <1.1 |       |      |      | <M                | 1    | 1            | 615           |
| NCTC7466            | 1.2>                         | 2.2>  | <2.3  | <PsrA | <2.1 | <1.1 |       |      |      | <M                | 1    | 2            | 595           |
| NT-110-58           | 1.1>                         | 2.1>  | PsrA> | 2.2>  | <2.3 | <1.2 |       |      |      | <M                | 1    | NE           | 344           |
| NU83127             | 1.1>                         | 2.1>  | <PsrA | 2.2>  | <2.3 | <1.1 |       |      |      | <M                | 3    | 4            | 246           |
| OXC141              | 1.2>                         | 2.3>  | <2.2  | <PsrA | <2.1 | <1.1 |       |      |      | <M                | 1    | 3            | 180           |
| P1031               | 1.2>                         | 2.1>  | PsrA> | 2.3>  | <2.2 | <1.2 |       |      |      | <M                | 3    | 1            | 303           |
| PZ900701590         | 1.1>                         | 2.1>  | PsrA> | 2.3>  | <2.2 | <1.1 |       |      |      | <M                | 3    | 12F          | 6945          |
| R36A                | 1.1>                         | 2.2>  | <2.3  | <PsrA | <2.1 | <1.2 |       |      |      | <M                | 1    | NE           | 595           |
| R6                  | 1.2>                         | 2.2>  | <2.3  | <PsrA | <2.1 | <1.1 |       |      |      | <M                | 1    | NE           | 595           |
| R6CIB17             | 1.2>                         | 2.2>  | <2.3  | <PsrA | <2.1 | <1.1 |       |      |      | <M                | 1    | NE           | 595           |
| Rx1                 | 1.2>                         | 2.1>  | PsrA> | 2.3>  | <2.2 | <1.1 |       |      |      | <M                | 1    | NE           | 595           |
| SCAID PHRX1-2021    | 1.2>                         | 2.1>  | PsrA> | 2.3>  | <2.2 | <1.1 |       |      |      | <M                | 1    | unidentified | 377           |
| SNP034156           | 1.2>                         | 2.1>  | PsrA> | 2.2>  | <2.3 | <1.1 |       |      |      | <M                | 1    | 3            | 180           |
| SP49                | 1.2>                         | 2.1>  | PsrA> | 2.2>  | <2.3 | <1.1 |       |      |      | <M                | 1    | 19A          | 277           |
| SP61                | 1.2>                         | 2.1>  | PsrA> | 2.2>  | <2.3 | <1.1 |       |      |      | <M                | 1    | 19A          | 2432          |
| SP64                | 1.2>                         | 2.1>  | PsrA> | 2.2>  | <2.3 | <1.1 |       |      |      | <M                | 1    | 19A          | 320           |
| SPN XDR SMC1710-32  | <PsrA                        | <2.1  | <1.1  |       |      |      |       |      |      | <M                | 5    | 15A          | 8279          |
| SPN032672           | 1.2>                         | 2.3>  | <2.2  | <1.1  |      |      |       |      |      | <M                | 2    | 1            | unidentified  |
| ST556               | 1.2>                         | 2.1>  | PsrA> | 2.2>  | <2.3 | <1.1 |       |      |      | <M                | 1    | 19F          | 1392          |
| SWU02               | 1.1>                         | 2.1>  | PsrA> | 2.2>  | <2.3 | <1.2 |       |      |      | <M                | 1    | 19F          | unidentified  |
| Taiwan19F-14        | 1.2>                         | 2.2>  | <2.3  | <1.1  |      |      |       |      |      | <M                | 2    | 19F          | 236           |
| TCH8431/19A         | 1.2>                         | 2.1>  | PsrA> | 2.3>  | <2.2 | <1.1 |       |      |      | <M                | 1    | 19A          | 320           |
| TIGR4; ATCC BAA-334 | 1.2>                         | 2.1>  | PsrA> | 2.3>  | <2.2 | <1.1 |       |      |      | <M                | 1    | 4            | 205           |
| Xen35               | 1.2>                         | 2.1>  | PsrA> | 2.3>  | <2.2 | <1.1 |       |      |      | <M                | 1    | 4            | 205           |

**B**

| SpnIII Type        | Prevalence in Genomes |
|--------------------|-----------------------|
| 1                  | 68.3%                 |
| 2                  | 8.5%                  |
| 3                  | 18.3%                 |
| 4                  | 2.4%                  |
| 5                  | 6.1%                  |
| Two SpnIII Systems | 6.1%                  |
| Absent             | 2.4%                  |

**Supplementary Table 1.** SpnIII systems in fully annotated NCBI *S. pneumoniae* genomes. **A)** Orientation and genetic features of SpnIII systems. Direction of each feature indicated with either > or <. *hsdS* sequences 1.1, 1.2, 2.1, 2.2 and 2.3 included. **Red** highlighted sections have low (<80%) sequence identity to known *hsdS* sequences. “?” indicates a *hsdS* region with an identity <50% to the known *hsdS* sequences. Duplications of features are indicated in **Green**. The CreX recombinase – Pneumococcal site-specific recombinase A (PsrA) included in **Bold**. The sequence for the associated Methyltransferase (M) was also included with orientation. Serotype and Sequence Type information for each strain have been included where available. \*NA indicates the strain contains 6 of 7 MLST genes, and NE indicates the strain is non-encapsulated. The prevalence of each major type of SpnIII system found in genomes can be seen in **B)**. Type 1 is the ‘traditional’ six-way switch as seen in **Figure 1A**. Type 2, seen in **Figure 1B**, is a four-way switch. Type 3 is a three-way switch as per **Figure 1C**. Type 4 is a two-way switch, as per **Figure 1D**. Type 5 were instances that did not fall into the previous four categories.



| <b>B</b>      | Protein Antigen Expression in TIGR4 |             |             |             |             |             |             |            |             |             |
|---------------|-------------------------------------|-------------|-------------|-------------|-------------|-------------|-------------|------------|-------------|-------------|
| <b>Allele</b> | <b>CbpA</b>                         | <b>GlpO</b> | <b>MalX</b> | <b>NanA</b> | <b>NanB</b> | <b>PhtD</b> | <b>PiuA</b> | <b>Ply</b> | <b>PsaA</b> | <b>PspA</b> |
| A             |                                     |             |             |             |             |             |             |            |             |             |
| B             | 3.0                                 | 13.6        | 8.9         | 36.3        | 116.4       | 2.0         | 6.7         | 3.2        | 3.5         | 2.7         |
| C             | 2.0                                 | 3.4         | 12.0        | 12.7        | 45.3        | -1.9        | -1.0        | 2.3        | 2.0         | 2.3         |
| D             | 5.2                                 | 29.5        | 69.8        | 174.0       | 246.8       | 5.7         | 1.6         | 7.8        | 11.0        | 27.9        |
| E             | 1.1                                 | -6.1        | -1.2        | -2.8        | -32.3       | -1.5        | -2.8        | 1.8        | -1.5        | 1.7         |
| F             | 3.0                                 | 23.4        | 19.4        | 43.5        | 84.9        | 1.1         | 10.2        | 15.2       | 13.3        | 6.6         |
|               |                                     |             |             |             |             |             |             |            |             |             |
| <b>Allele</b> | <b>CbpA</b>                         | <b>GlpO</b> | <b>MalX</b> | <b>NanA</b> | <b>NanB</b> | <b>PhtD</b> | <b>PiuA</b> | <b>Ply</b> | <b>PsaA</b> | <b>PspA</b> |
| A             | -3.0                                | -13.6       | -8.9        | -36.3       | -116.4      | -1.7        | -6.7        | -3.2       | -3.5        | -2.7        |
| B             |                                     |             |             |             |             |             |             |            |             |             |
| C             | -1.5                                | -4.0        | 1.3         | -2.8        | -2.6        | -3.2        | -6.7        | -1.4       | -1.7        | -1.2        |
| D             | 1.7                                 | 2.2         | 7.8         | 4.8         | 2.1         | 3.3         | -4.3        | 2.4        | 3.1         | 10.2        |
| E             | -2.7                                | -82.8       | -10.3       | -102.5      | -3762.8     | -2.6        | -18.9       | -1.8       | -5.1        | -1.6        |
| F             | 1.0                                 | 1.7         | 2.2         | 1.2         | -1.4        | -1.5        | 1.5         | 4.7        | 3.8         | 2.4         |
|               |                                     |             |             |             |             |             |             |            |             |             |
| <b>Allele</b> | <b>CbpA</b>                         | <b>GlpO</b> | <b>MalX</b> | <b>NanA</b> | <b>NanB</b> | <b>PhtD</b> | <b>PiuA</b> | <b>Ply</b> | <b>PsaA</b> | <b>PspA</b> |
| A             | -2.0                                | -3.4        | -12.0       | -12.7       | -45.3       | 3.5         | 1.0         | -2.3       | -2.0        | -2.3        |
| B             | 1.5                                 | 4.0         | -1.3        | 2.8         | 2.6         | 7.1         | 6.7         | 1.4        | 1.7         | 1.2         |
| C             |                                     |             |             |             |             |             |             |            |             |             |
| D             | 2.6                                 | 8.7         | 5.8         | 13.6        | 5.5         | 19.7        | 1.6         | 3.4        | 5.4         | 12.3        |
| E             | -1.8                                | -20.8       | -13.8       | -36.0       | -1463.5     | 2.3         | -2.8        | -1.3       | -2.9        | -1.3        |
| F             | 1.5                                 | 6.9         | 1.6         | 3.4         | 1.9         | 3.9         | 10.2        | 6.7        | 6.5         | 2.9         |
|               |                                     |             |             |             |             |             |             |            |             |             |
| <b>Allele</b> | <b>CbpA</b>                         | <b>GlpO</b> | <b>MalX</b> | <b>NanA</b> | <b>NanB</b> | <b>PhtD</b> | <b>PiuA</b> | <b>Ply</b> | <b>PsaA</b> | <b>PspA</b> |
| A             | -5.2                                | -29.5       | -69.8       | -174.0      | -246.8      | -5.7        | -1.6        | -7.8       | -11.0       | -27.9       |
| B             | -1.7                                | -2.2        | -7.8        | -4.8        | -2.1        | -2.8        | 4.3         | -2.4       | -3.1        | -10.2       |
| C             | -2.6                                | -8.7        | -5.8        | -13.6       | -5.5        | -10.6       | -1.6        | -3.4       | -5.4        | -12.3       |
| D             |                                     |             |             |             |             |             |             |            |             |             |
| E             | -4.7                                | -179.7      | -80.6       | -491.0      | -7981.1     | -8.5        | -4.4        | -4.4       | -16.0       | -16.0       |
| F             | -1.7                                | -1.3        | -3.6        | -4.0        | -2.9        | -5.0        | 6.5         | 2.0        | 1.2         | -4.2        |
|               |                                     |             |             |             |             |             |             |            |             |             |
| <b>Allele</b> | <b>CbpA</b>                         | <b>GlpO</b> | <b>MalX</b> | <b>NanA</b> | <b>NanB</b> | <b>PhtD</b> | <b>PiuA</b> | <b>Ply</b> | <b>PsaA</b> | <b>PspA</b> |
| A             | -1.1                                | 6.1         | 1.2         | 2.8         | 32.3        | 1.5         | 2.8         | -1.8       | 1.5         | -1.7        |
| B             | 2.7                                 | 82.8        | 10.3        | 102.5       | 3762.8      | 3.1         | 18.9        | 1.8        | 5.1         | 1.6         |
| C             | 1.8                                 | 20.8        | 13.8        | 36.0        | 1463.5      | -1.3        | 2.8         | 1.3        | 2.9         | 1.3         |
| D             | 4.7                                 | 179.7       | 80.6        | 491.0       | 7981.1      | 8.5         | 4.4         | 4.4        | 16.0        | 16.0        |
| E             |                                     |             |             |             |             |             |             |            |             |             |
| F             | 2.7                                 | 143.0       | 22.4        | 122.9       | 2747.0      | 1.7         | 28.7        | 8.6        | 19.3        | 3.8         |
|               |                                     |             |             |             |             |             |             |            |             |             |
| <b>Allele</b> | <b>CbpA</b>                         | <b>GlpO</b> | <b>MalX</b> | <b>NanA</b> | <b>NanB</b> | <b>PhtD</b> | <b>PiuA</b> | <b>Ply</b> | <b>PsaA</b> | <b>PspA</b> |
| A             | -3.0                                | -23.4       | -19.4       | -43.5       | -84.9       | -1.1        | -10.2       | -15.2      | -13.3       | -6.6        |
| B             | -1.0                                | -1.7        | -2.2        | -1.2        | 1.4         | 1.8         | -1.5        | -4.7       | -3.8        | -2.4        |
| C             | -1.5                                | -6.9        | -1.6        | -3.4        | -1.9        | -2.1        | -10.2       | -6.7       | -6.5        | -2.9        |
| D             | 1.7                                 | 1.3         | 3.6         | 4.0         | 2.9         | 5.0         | -6.5        | -2.0       | -1.2        | 4.2         |
| E             | -2.7                                | -143.0      | -22.4       | -122.9      | -2747.0     | -1.7        | -28.7       | -8.6       | -19.3       | -3.8        |
| F             |                                     |             |             |             |             |             |             |            |             |             |

**Supplementary Table 2.** Putative vaccine target RTqPCR. Heatmap of putative vaccine target gene expression across strains **A**) D39 and **B**) TIGR4 expressing individual SpnDIII alleles ranging from red

(- fold difference) to green (+ fold difference). Gene expression values from locked alleles in grey have been used as a baseline against other alleles.

| Primer Name  | Forward/Reverse | Sequence (5' - 3')       |
|--------------|-----------------|--------------------------|
| CbpA_RT_F    | F               | CAAGGTAAACCAAAGGGGCG     |
| CbpA_RT_R    | R               | TCAGGGATGAGCTTGGAAGAG    |
| GlpO_RT_F    | F               | CATTGCCAACCACGTGAAGG     |
| GlpO_RT_R    | R               | AACCAGACGGGCCTTGATTT     |
| MalX_RT_F    | F               | TACGCATTCGCTGGTGAAGA     |
| MalX_RT_R    | R               | AGCGTCTTTACCGTTTTGGC     |
| NanA_RT_F    | F               | ATGACGACGGGAAGACATGG     |
| NanA_RT_R    | R               | TTGTGAGGCCCATTCGAAG      |
| NanB_RT_F    | F               | TCTAGAAGTGGCCGTAAGGGA    |
| NanB_RT_R    | R               | AGGCATAACCATACGAAGGCAA   |
| PhtD_RT_F    | F               | AGCTGTTCGAAAAGTAGGCCA    |
| PhtD_RT_R    | R               | ACTTTCCTGCTTGCCAGTT      |
| Ply_RT_F     | F               | CCCACTCTTCTTGCGGTTGA     |
| Ply_RT_R     | R               | TCCGCGAACACTTGAATTGC     |
| PspA_RT_R    | F               | CGCTCCTCAAGCTAAAATCGC    |
| PspA_RT_R    | R               | GAAGAGGAGCACGGAAACCT     |
| PiuA_RT_F    | F               | CCGAAGGCACTTGCTAAGGA     |
| PiuA_RT_R    | R               | TCGCTTCAACCACGTACACAA    |
| PsaA_RT_F    | F               | CAGCGACGGCGTTGATGTTA     |
| PsaA_RT_R    | R               | TTGGCGCTCAATTGTTTGGC     |
| lytA_RT_F    | F               | CGGTTGGAATGCTGAGACCT     |
| lytA_RT_R    | R               | GGCAAACCTGCTTCATCTGC     |
| T4_PspA_RT_F | F               | CCAGCGTCGCTATCTTAGGG     |
| T4_PspA_RT_R | R               | TCTTGGCAGTATCAGCTTTTGC   |
| T4_PhtD_RT_F | F               | AGCAGTAGTTGCAGCCAGAG     |
| T4_PhtD_RT_R | R               | TAATGGTCGCCGTGAGGAAC     |
| 16s_RT_F     | F               | AACCAAGTAACTTTGAAAGAAGAC |
| 16s_RT_R     | R               | AAATTTAGAATCGTGGAATTTTT  |

**Supplementary Table 3.** RTqPCR Primers.

# Supplementary Figure 1

A

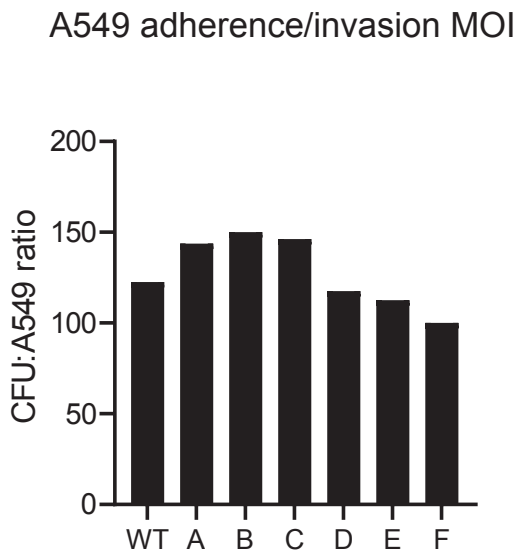

B

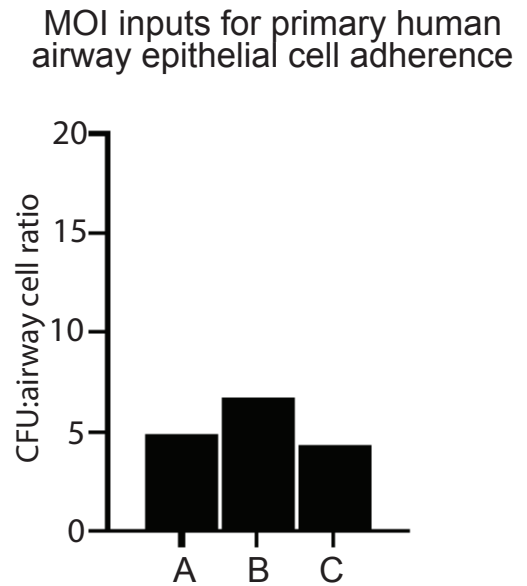

C

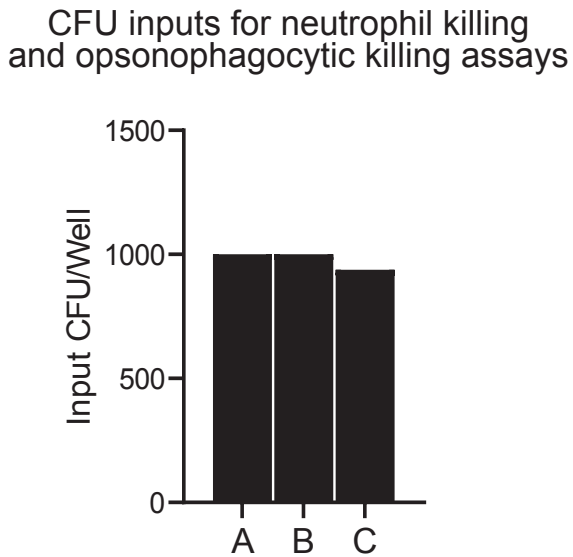

D

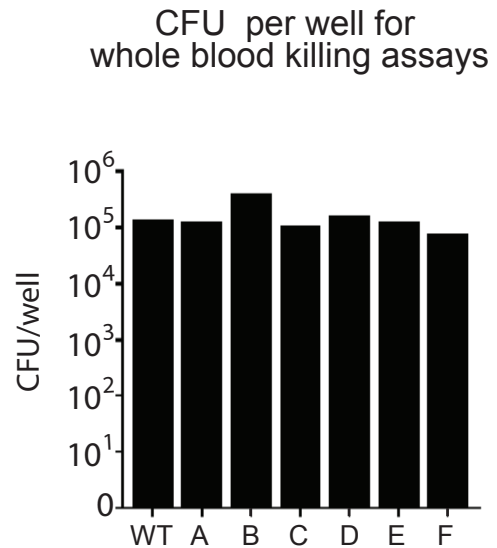

**Supplementary Figure 1.** Balanced *S. pneumoniae* D39 SpnIII locked allele inputs. Input colony forming unit (CFU) loads were standardised for experiments. A multiplicity of infection (MOI) of ~100:1 (CFU:A549) was used for adherence and invasion to A549 cells (**A**) and ~5:1 (CFU:Airway Cell) for adherence to human airway cells (**B**). 1000 CFU per well were used in neutrophil killing and opsonophagocytic killing assays (**C**). Approximately 50 000 CFU per well were used in the whole blood killing assay (**D**).

# Supplementary Figure 2

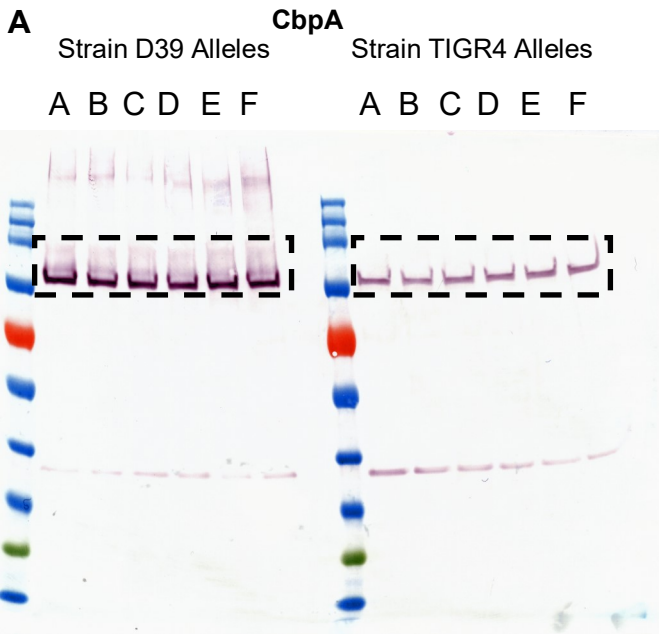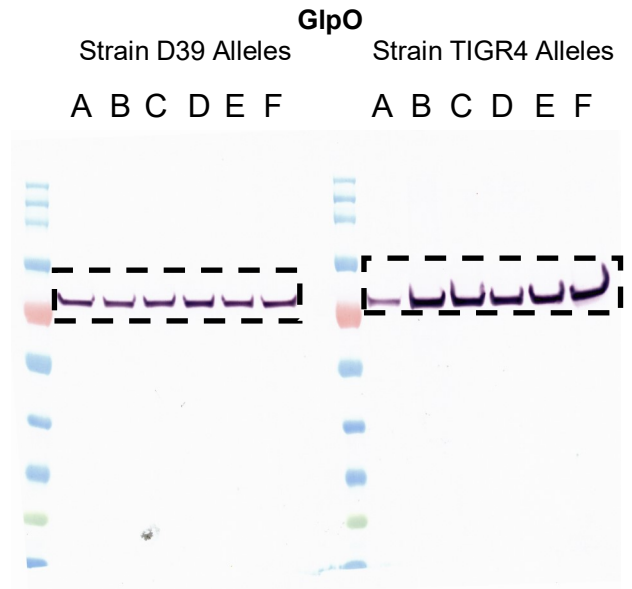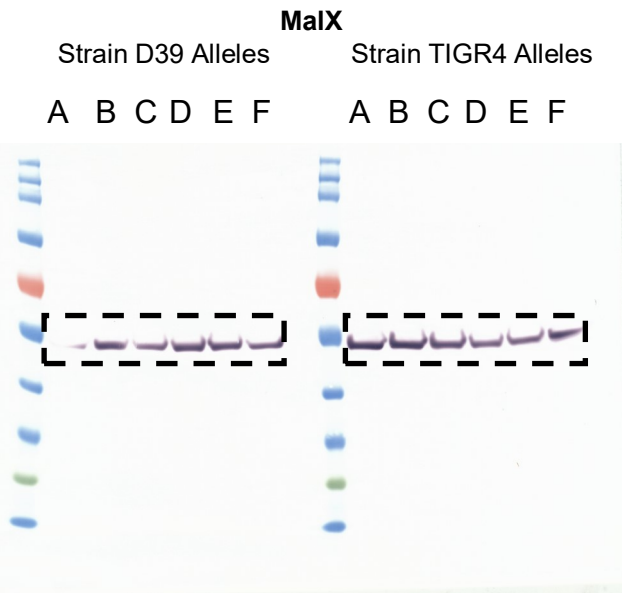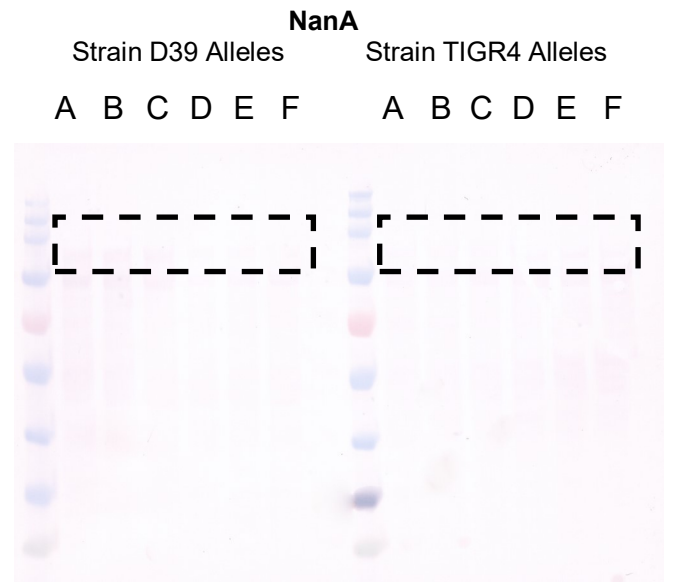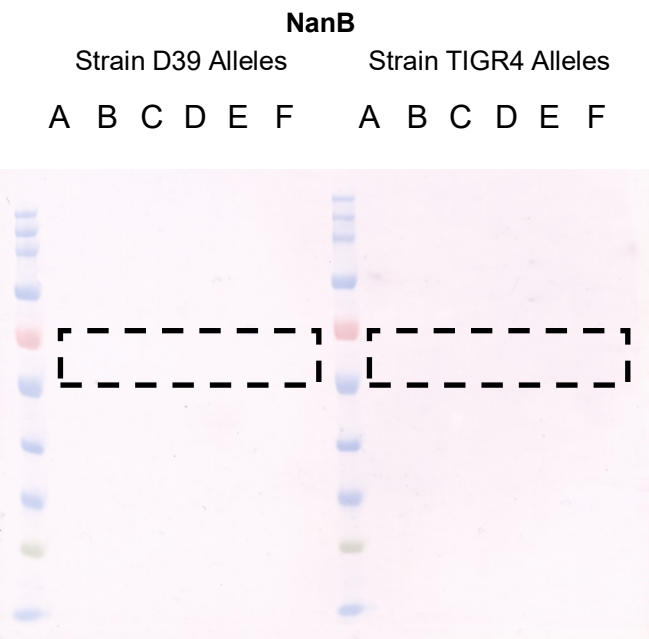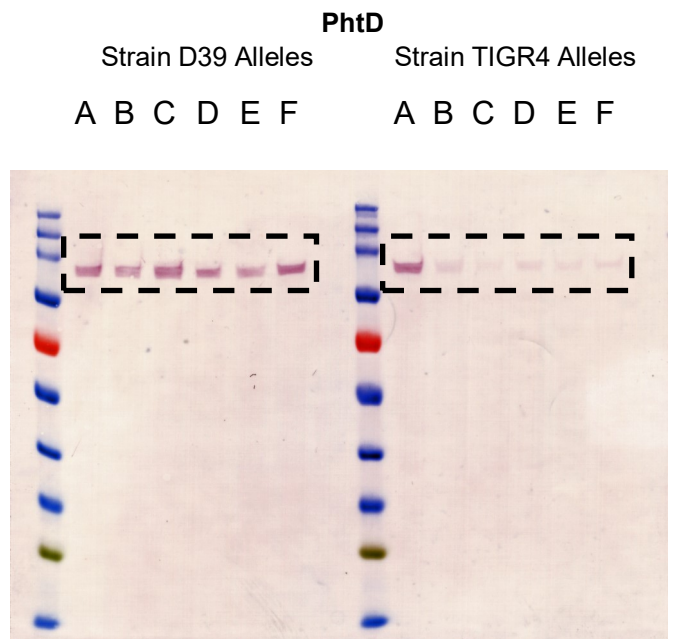

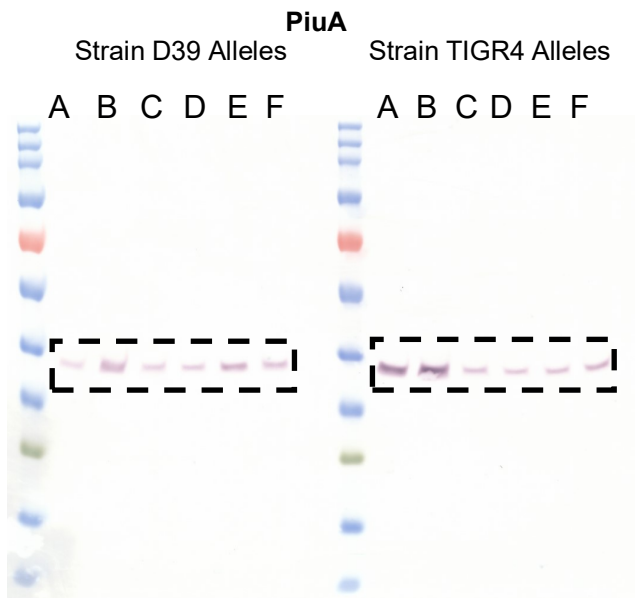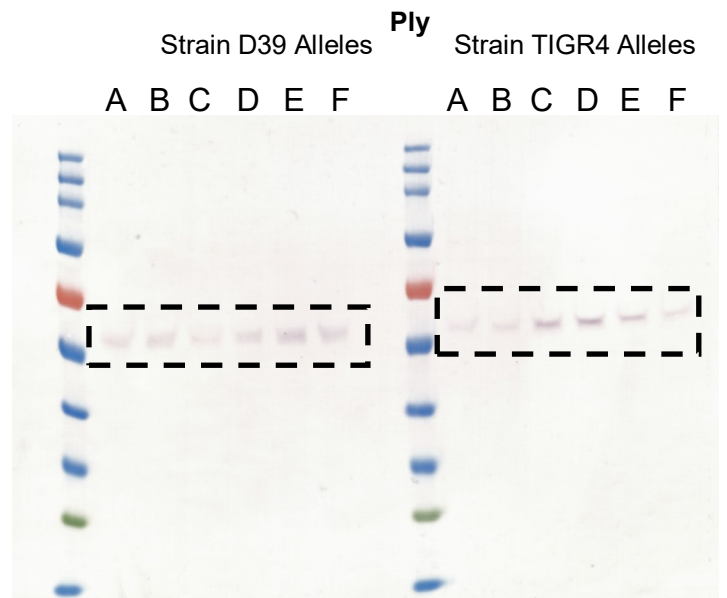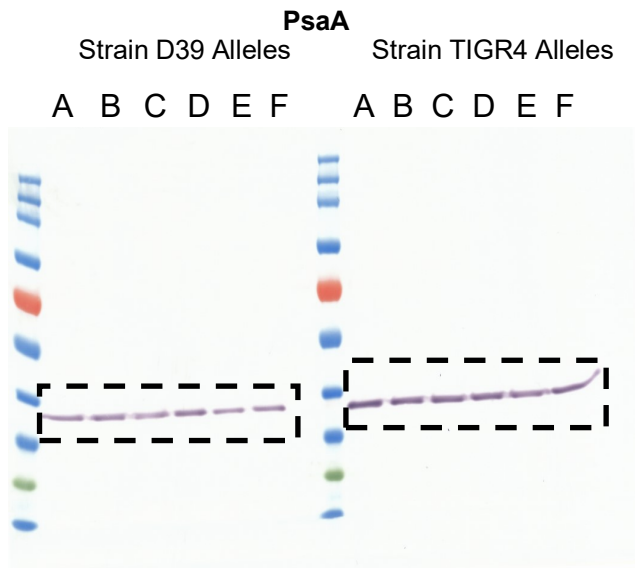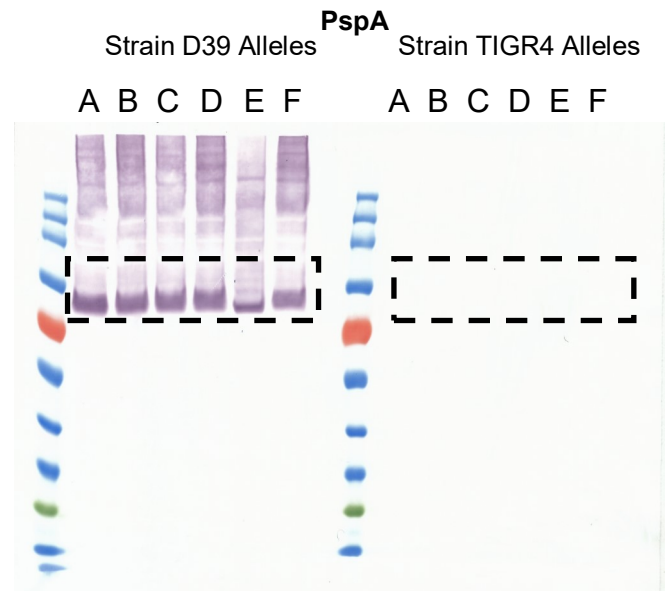

**Supplementary Figure 2A.** Full images of vaccine candidate Western Blots. Full scans of Western Blots using vaccine candidate anti-sera against *S. pneumoniae* D39 and TIGR4 locked SpnIII alleles. The outlined section of each Blot has been used in **Figure 3**.





**C**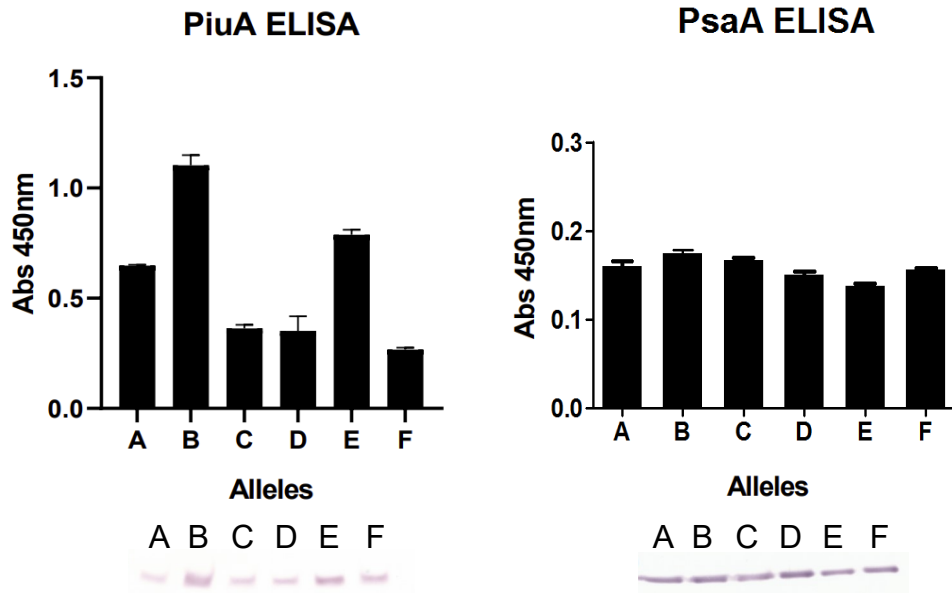**Quantitative Western Blot**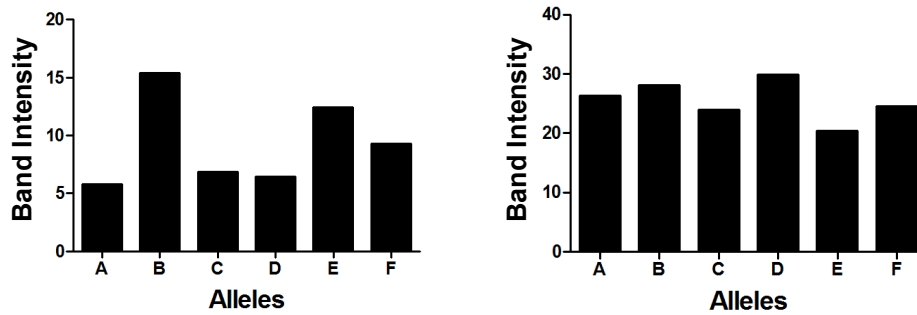**Fold Difference from Most Intense Band**

| PiuA Fold Difference |     | PsaA Fold Difference |     |
|----------------------|-----|----------------------|-----|
| B vs A               | 2.7 | D vs A               | 1.1 |
| B vs C               | 2.3 | D vs B               | 1.1 |
| B vs D               | 2.4 | D vs C               | 1.2 |
| B vs E               | 1.2 | D vs E               | 1.5 |
| B vs F               | 1.7 | D vs F               | 1.2 |

**Supplementary Figure 2C.** PiuA and PsaA ELISA with comparative Western Blot and quantified Western Blot values. Western Blot banding intensity was quantified in ImageJ. Fold differences calculated from the quantified Western Blot values are provided, using the most intense band as a baseline for comparison.
